# Supplementary material
Source: PubMed Central journal article supplement (PMC5125818)

Figure S1

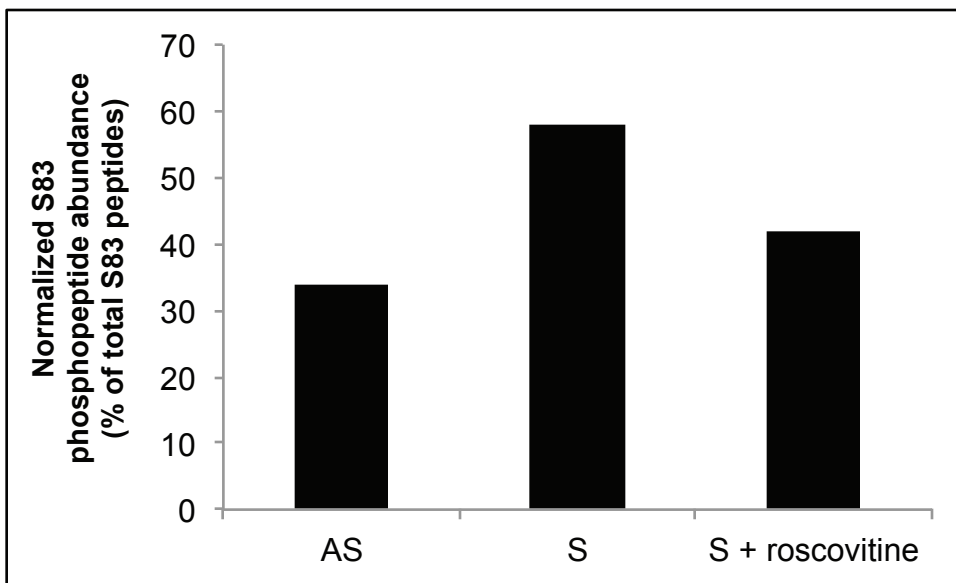

Supplement: NIHMS6343-supplement-1.pdf [file NIHMS6343-supplement-1.pdf]

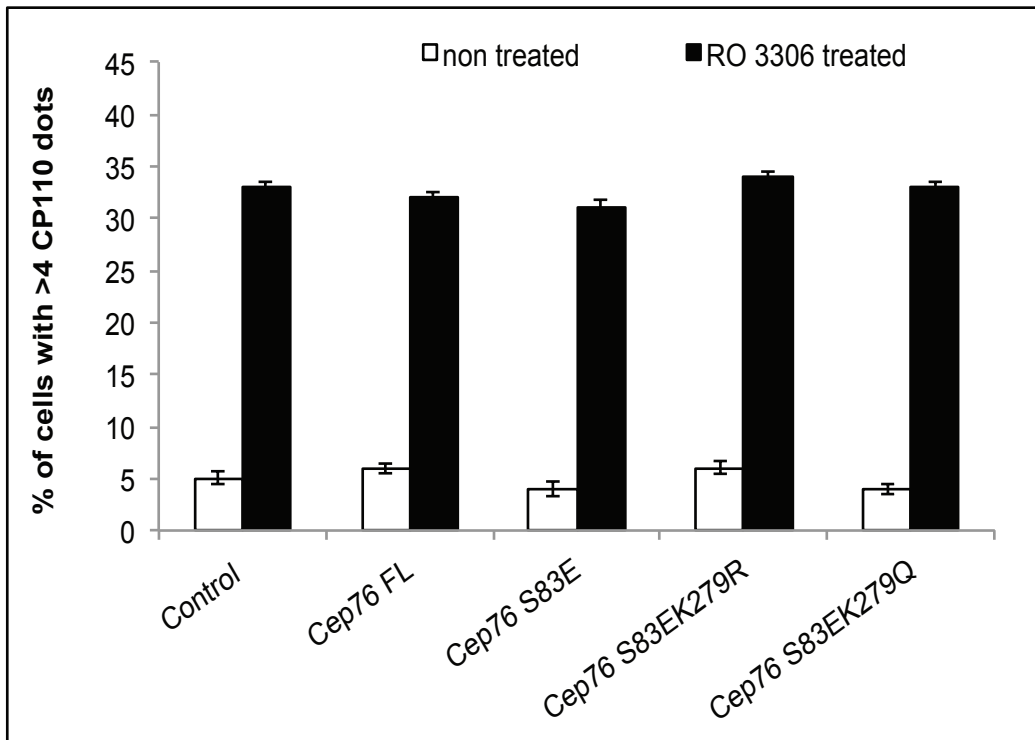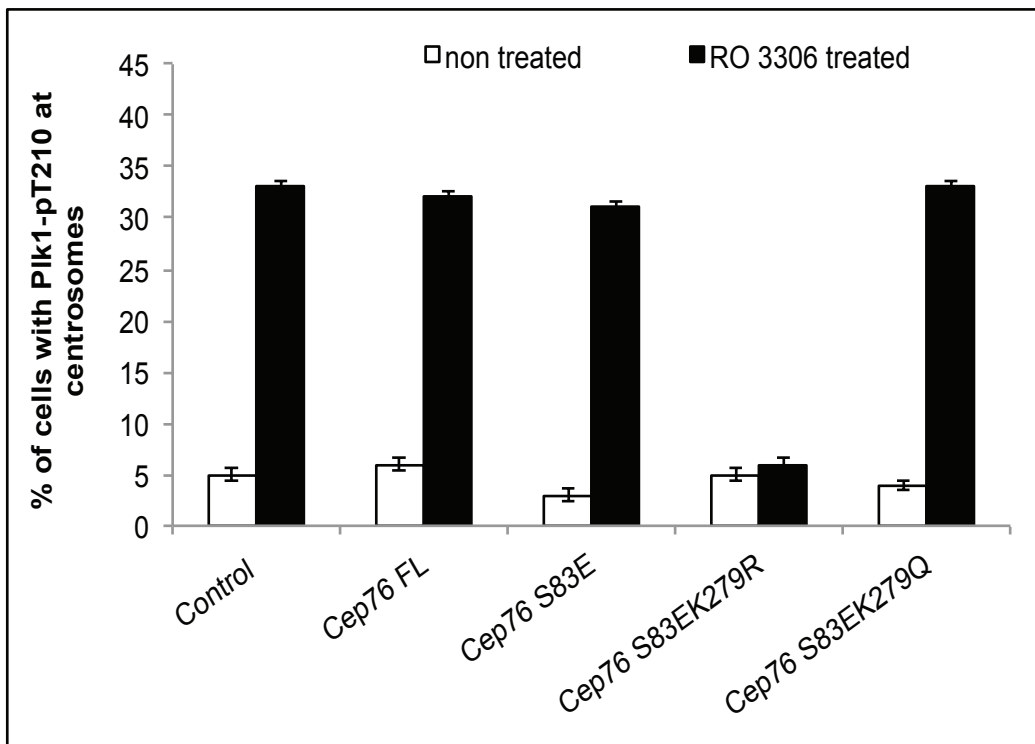

Supplement: NIHMS6343-supplement-10.pdf [file NIHMS6343-supplement-10.pdf]

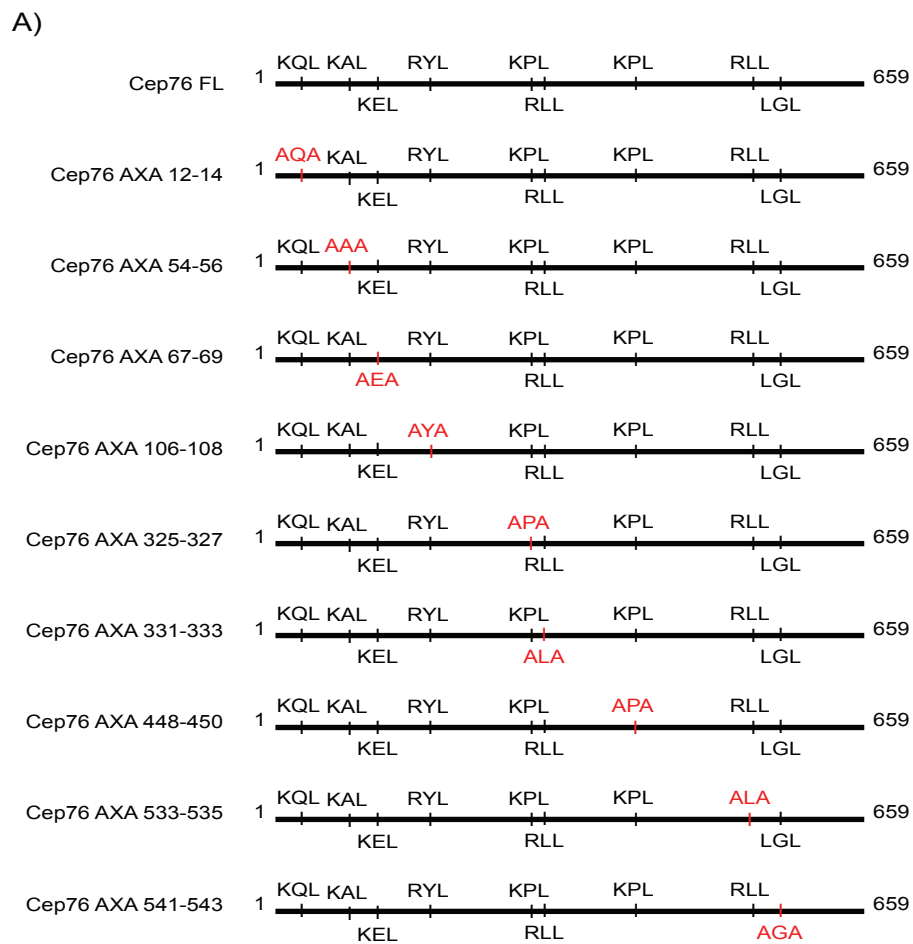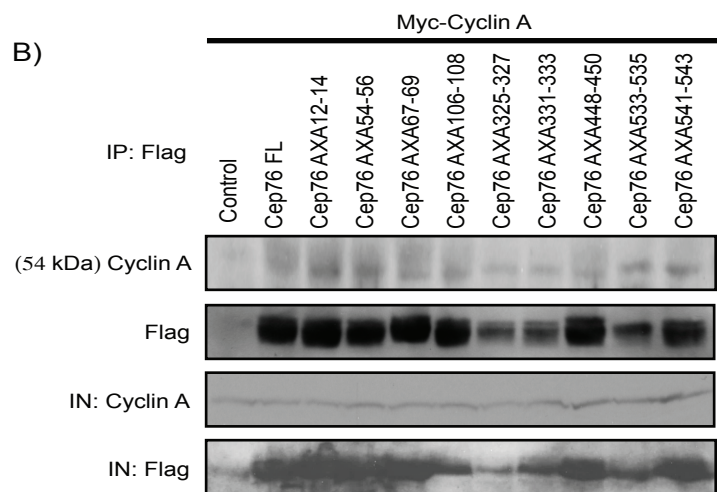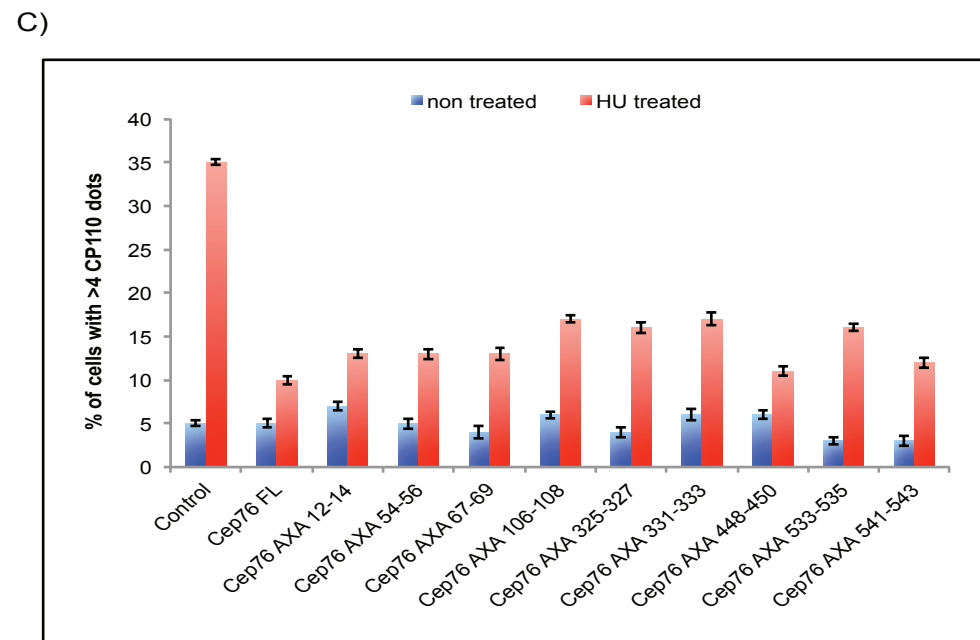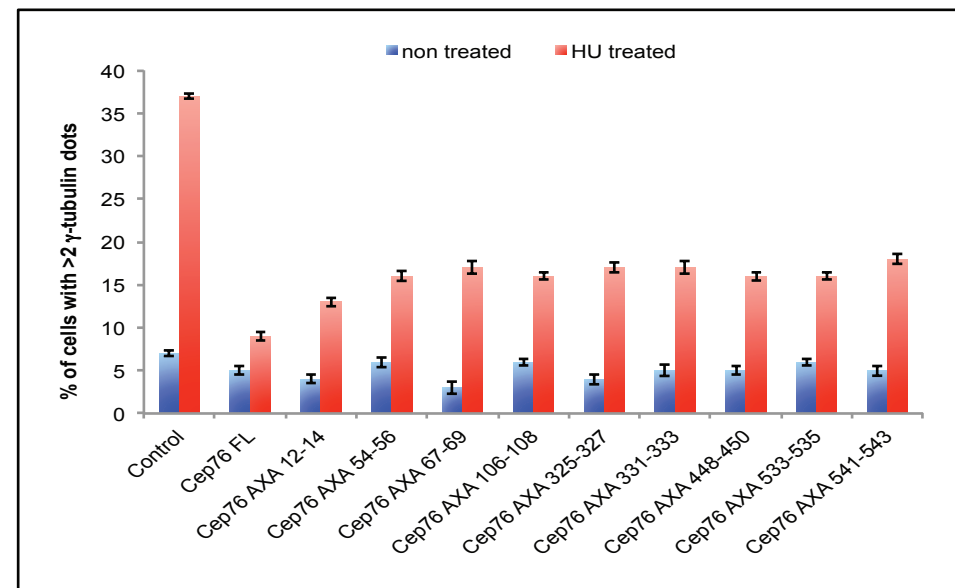

Supplement: NIHMS6343-supplement-2.pdf [file NIHMS6343-supplement-2.pdf]

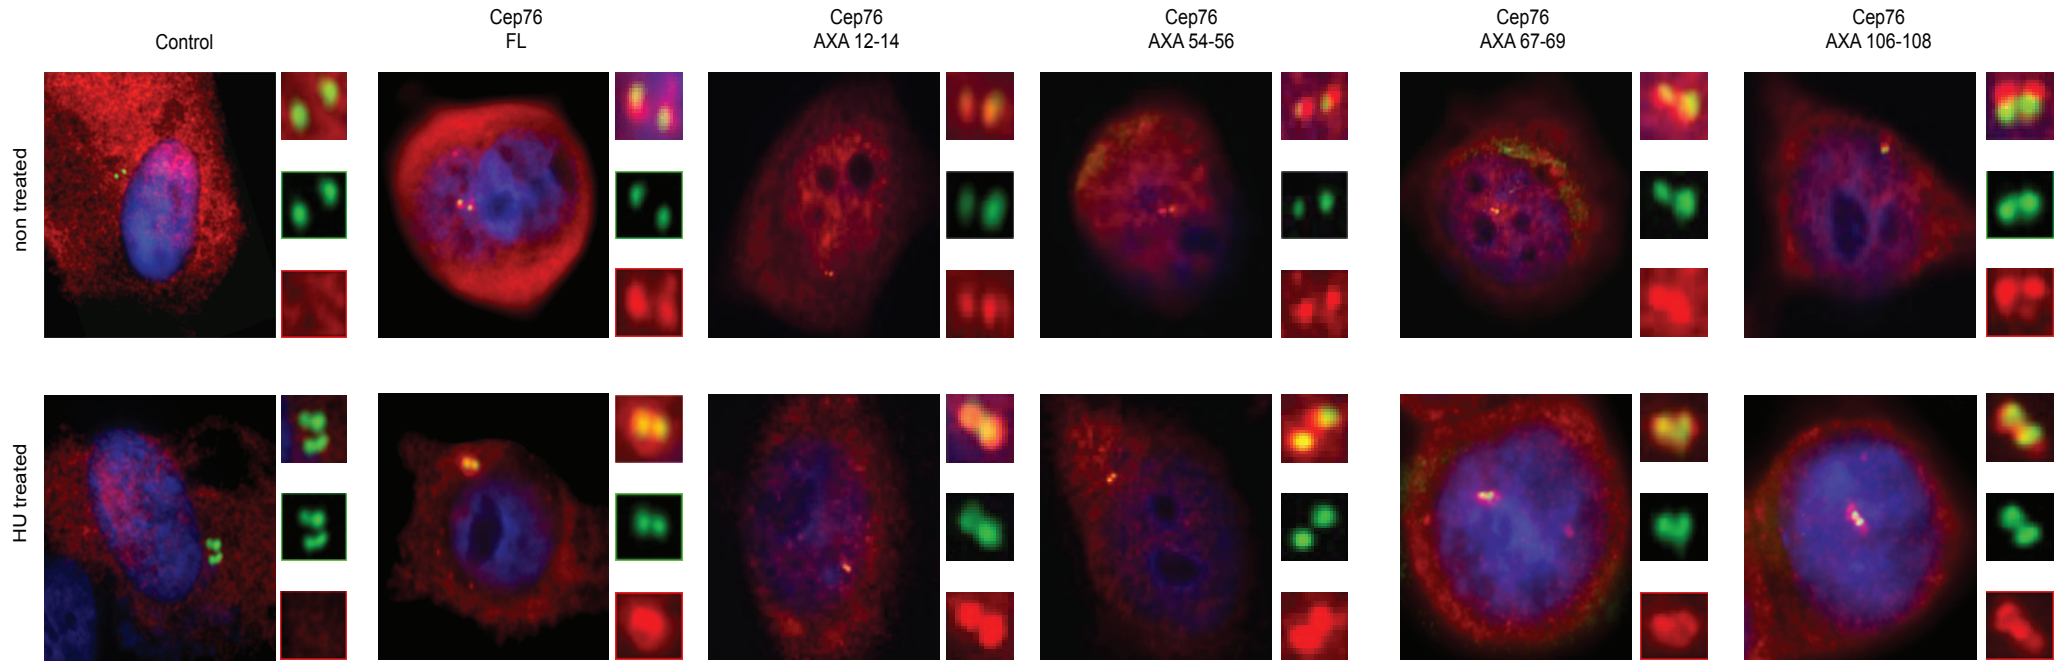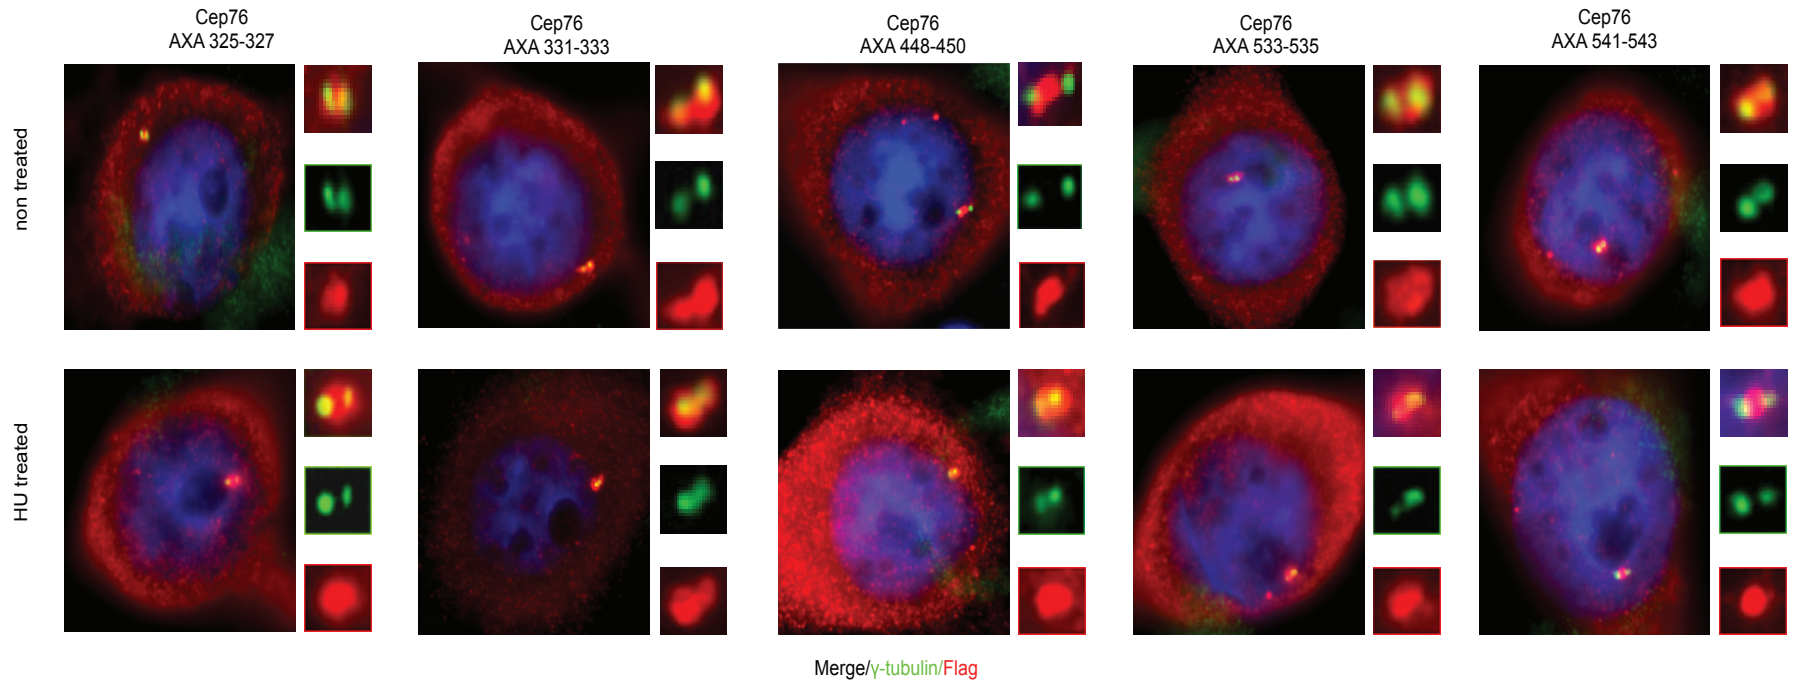

Supplement: NIHMS6343-supplement-3.pdf [file NIHMS6343-supplement-3.pdf]

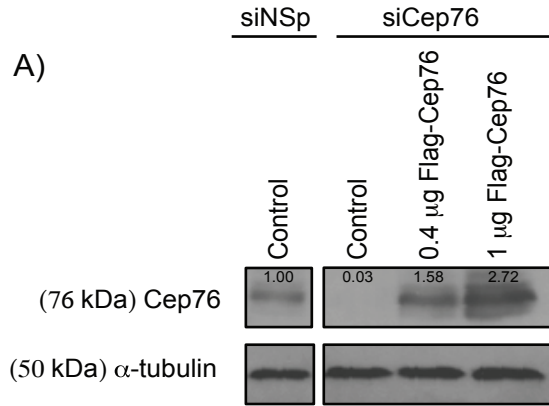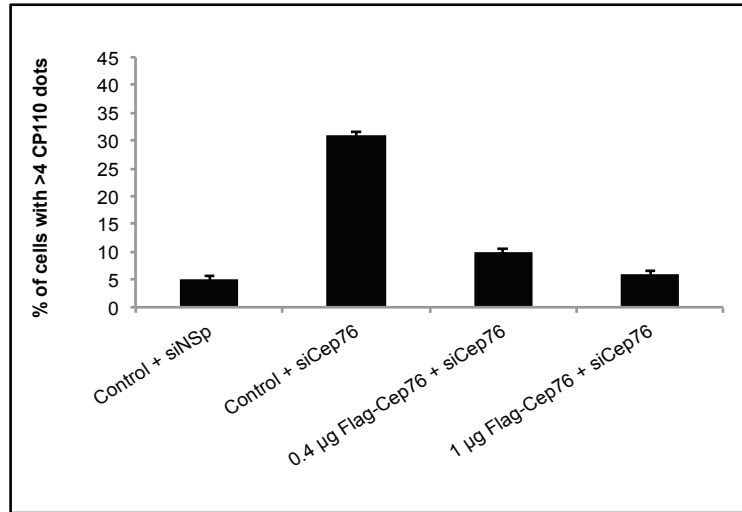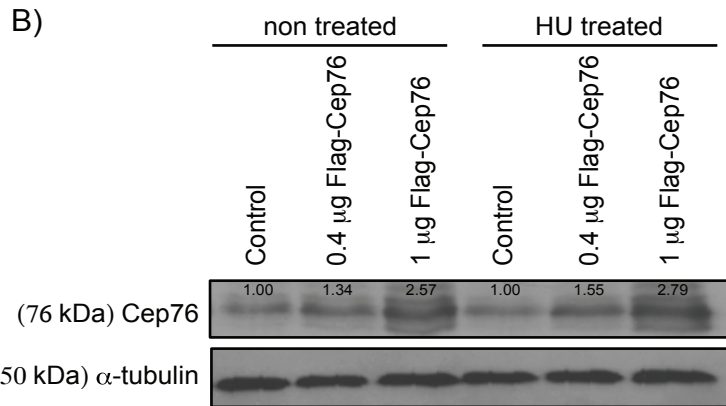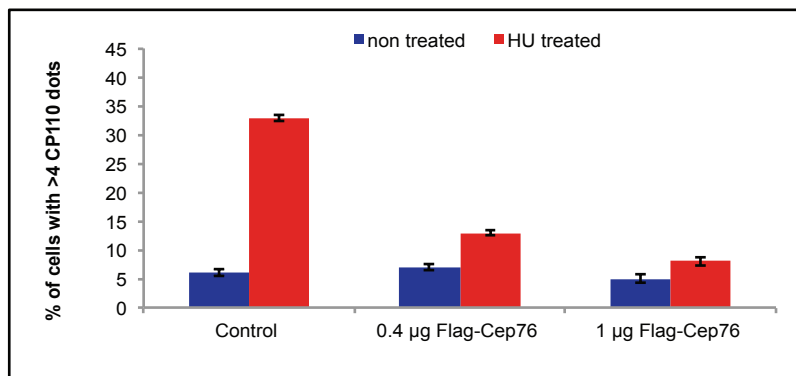

Supplement: NIHMS6343-supplement-4.pdf [file NIHMS6343-supplement-4.pdf]

A)

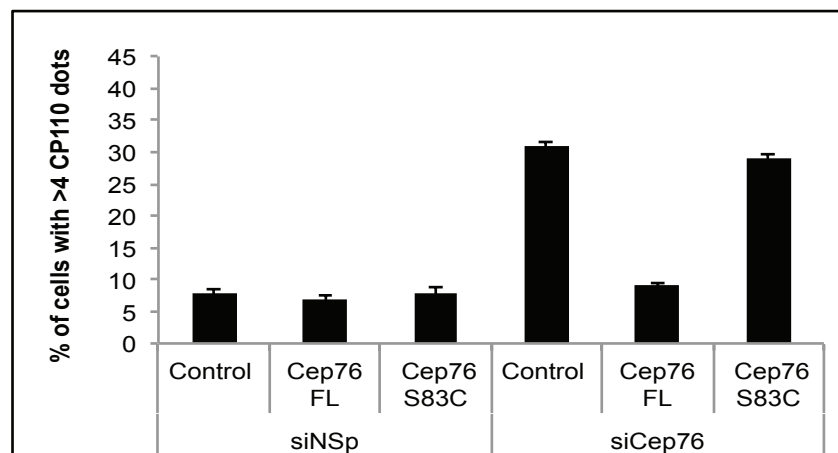

B)

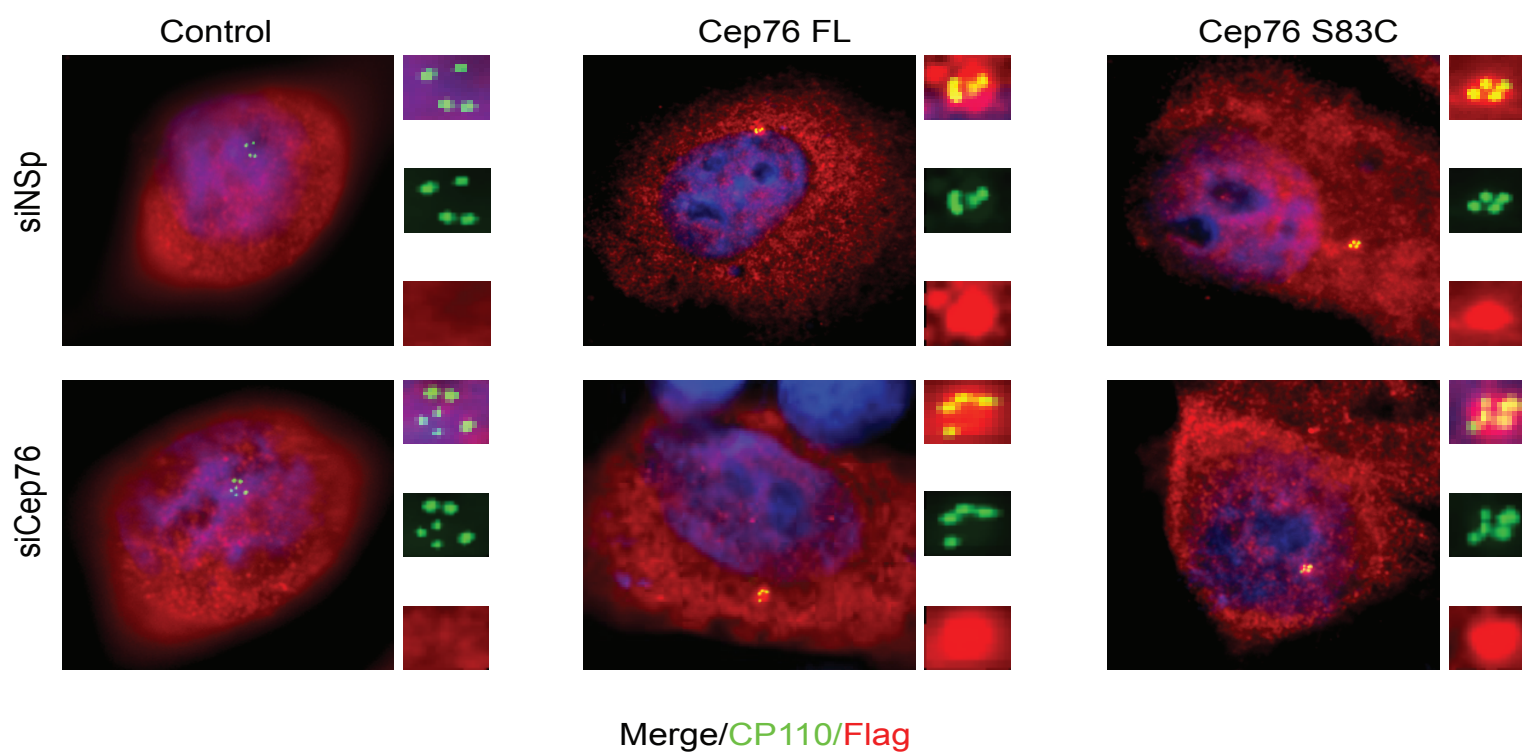

Supplement: NIHMS6343-supplement-5.pdf [file NIHMS6343-supplement-5.pdf]

A)

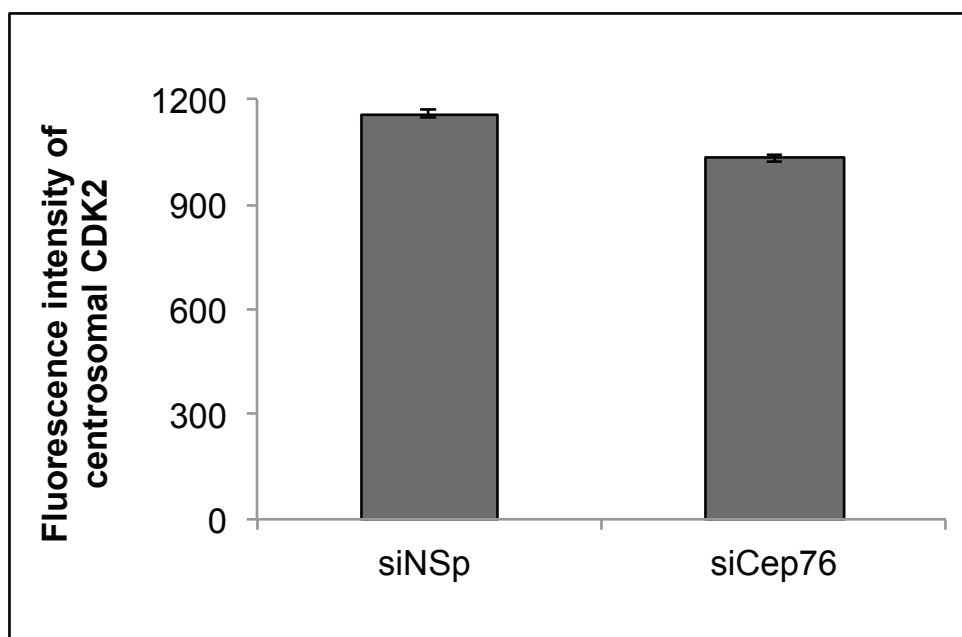

B)

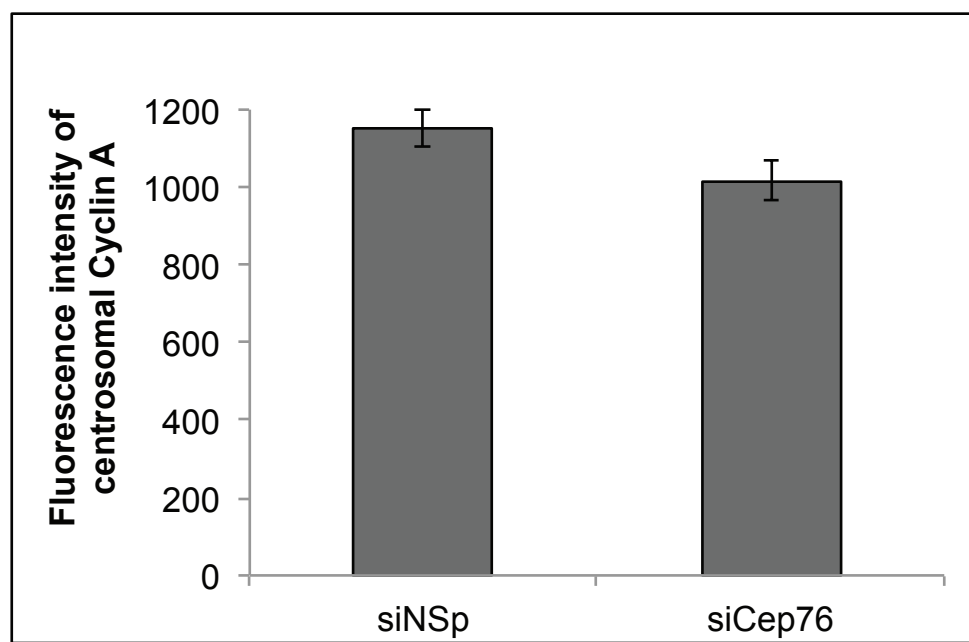

Supplement: NIHMS6343-supplement-6.pdf [file NIHMS6343-supplement-6.pdf]

A)

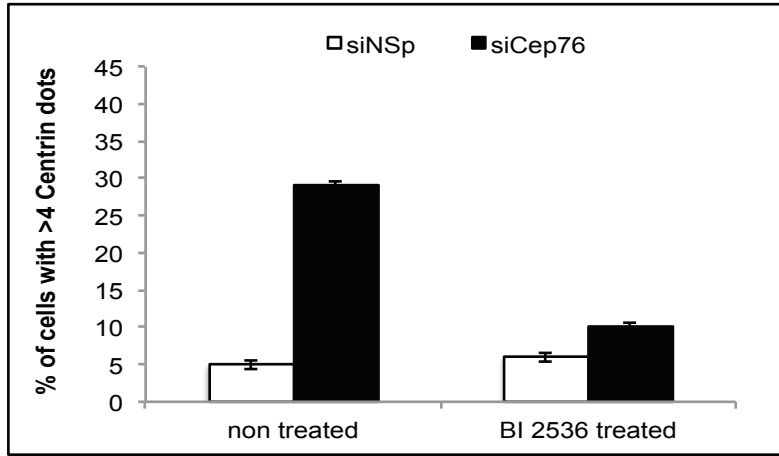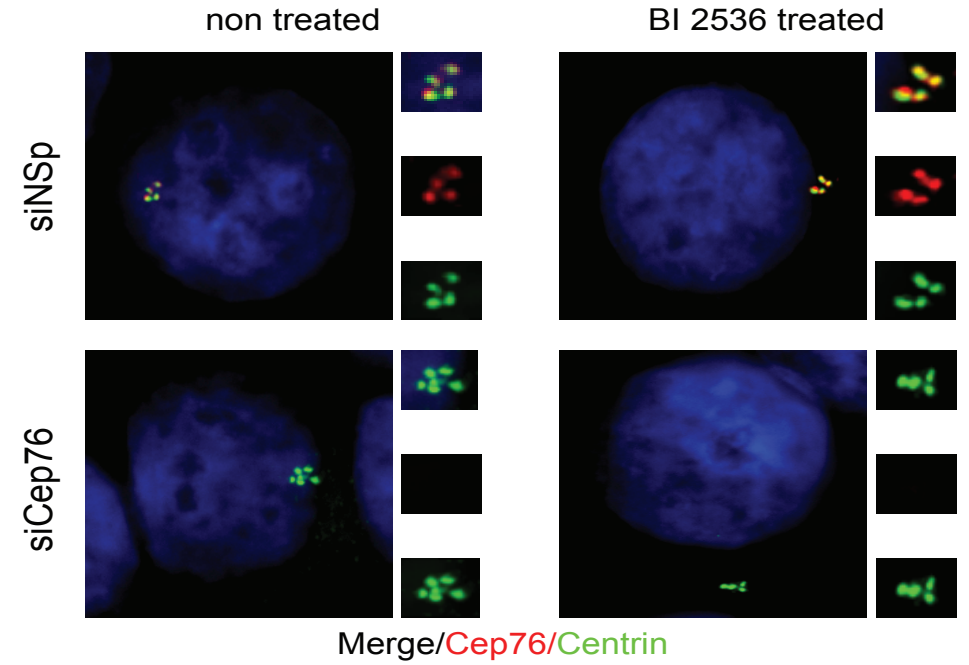

B)

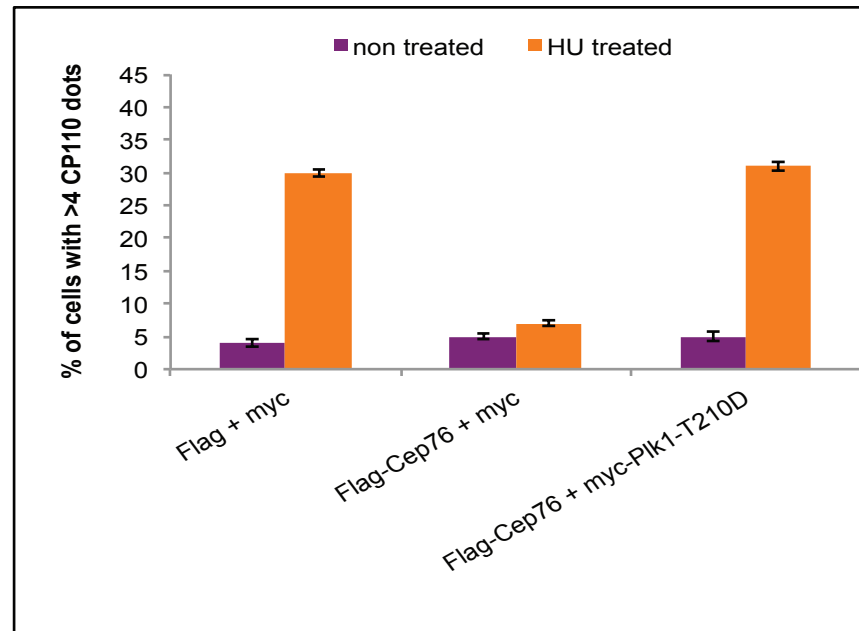

Supplement: NIHMS6343-supplement-7.pdf [file NIHMS6343-supplement-7.pdf]

Figure S8

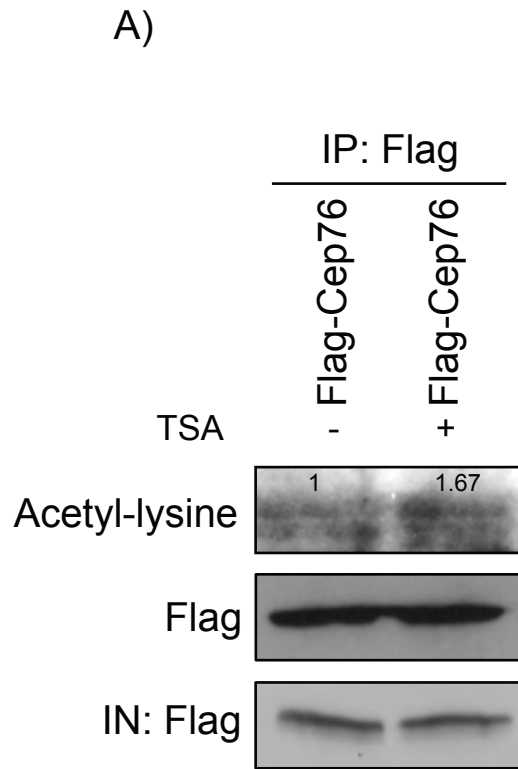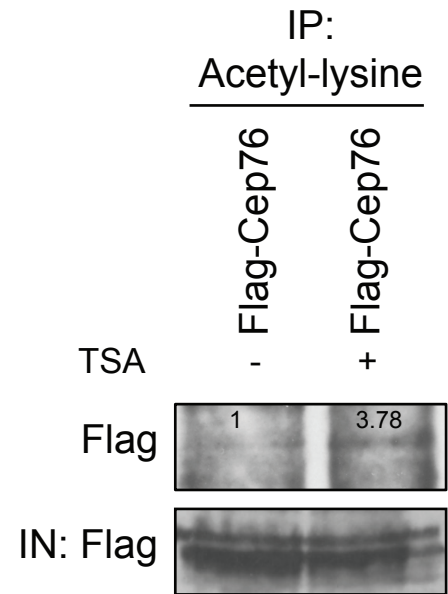

Supplement: NIHMS6343-supplement-8.pdf [file NIHMS6343-supplement-8.pdf]

Figure S9

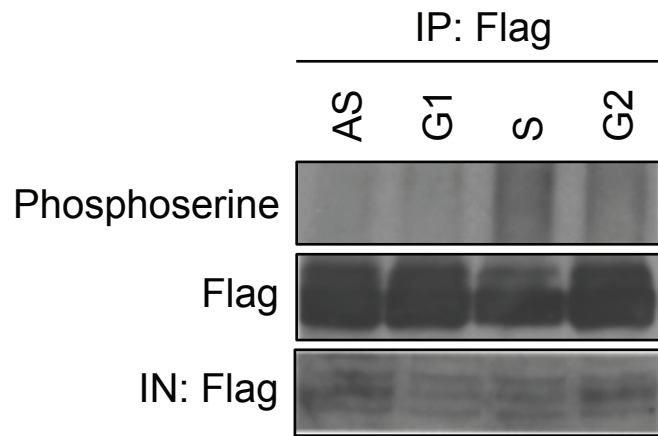

Supplement: NIHMS6343-supplement-9.pdf [file NIHMS6343-supplement-9.pdf]
